# Supplementary material
Source: publisher site journal article supplement (https://www.dovepress.com/article/391220)
Supplement: Supplementary file 1 [file get_supplementary_file.php]

**Supplementary table.** Investigators of the SPEED Trial

| Investigator | Affiliation |
| --- | --- |
| Yoshimasa Shiraishi | Department of Respiratory Medicine, Graduate School of Medical Sciences, Kyushu University, Fukuoka, Japan. |
| Isamu Okamoto | Department of Respiratory Medicine, Graduate School of Medical Sciences, Kyushu University, Fukuoka, Japan. |
| Yuko Tsuchiya-Kawano | Department of Respiratory Medicine, Kitakyushu Municipal Medical Center, Kitakyushu, Japan. |
| Hidenobu Ishii | Division of Respirology, Neurology, and Rheumatology, Department of Internal Medicine, Kurume University School of Medicine, Fukuoka, Japan. |
| Haruko Daga | Department of Medical Oncology, Osaka City General Hospital, Osaka, Japan. |
| Kentaro Ito | Respiratory Center, Matsusaka Municipal Hospital, Mie, Japan. |
| Taishi Harada | Department of Respiratory Medicine, Japan Community Healthcare Organization Kyushu Hospital, Kita-Kyushu, Japan. |
| Kazunori Tobino | Department of Respiratory Medicine, Iizuka Hospital, Fukuoka, Japan. |
| Tatsuro Okamoto | National Hospital Organization Kyushu Cancer Center, Fukuoka, Japan. |
| Masaki Fujita | Department of Respiratory Medicine, Fukuoka University School of Medicine, Fukuoka, Japan. |
| Hiroshi Gyotoku | Department of Respiratory Medicine, Nagasaki University Graduate School of Biomedical Sciences, Nagasaki, Japan. |
| Takuro Sakagami | Department of Respiratory Medicine, Graduate School of Medical Sciences, Kumamoto University, Kumamoto, Japan. |
| Ryotaro Morinaga | Department of Thoracic Medical Oncology, Oita Prefectural Hospital, Oita, Japan. |
| Keiko Mizuno | Department of Pulmonary Medicine, Kagoshima University Hospital, Kagoshima, Japan. |
| Kenji Chibana | Department of Respiratory Medicine, National Hospital Organization, Okinawa National Hospital, Okinawa, Japan. |
| Akito Hata | Department of Medical Oncology, Kobe Minimally Invasive Cancer Center, Kobe, Japan. |
| Tomohiro Sakamoto | Division of Respiratory Medicine and Rheumatology, Department of Multidisciplinary Internal Medicine, Tottori University, Tottori, Japan. |
| Kosuke Kashiwabara | Department of Respiratory Medicine, Kumamoto Regional Medical Center, Kumamoto, Japan |
| Yuki Misumi | Yokohama Municipal Citizen's Hospital, Kanagawa, Japan. |
| Katsuhiko Naoki | Department of Respiratory Medicine, Kitasato University School of Medicine, Kanagawa, Japan. |
| Yukihiro Toi | Department of Pulmonary Medicine, Sendai Kousei Hospital, Miyagi, Japan |
| Miiru Izumi | National Hospital Organization Omuta Hospital, Fukuoka, Japan |
| Hideaki Mizutani | Department of Thoracic Oncology, Saitama Cancer Center, Saitama, Japan. |
| Hiroshi Tanaka | Department of Internal Medicine, Niigata Cancer Center Hospital, Niigata, Japan. |
| Yusuke Nabe | Shimonoseki City Hospital, Yamaguchi, Japan. |
| Kazuo Nishikawa | Department of Medical Oncology and Hematology, Oita University Faculty of Medicine, Oita, Japan. |
